# Supplementary figures and images for: The axonal actin-spectrin lattice acts as a tension buffering shock absorber
Source: eLife journal article supplement (doi:10.7554/elife.51772), 2020-04-08

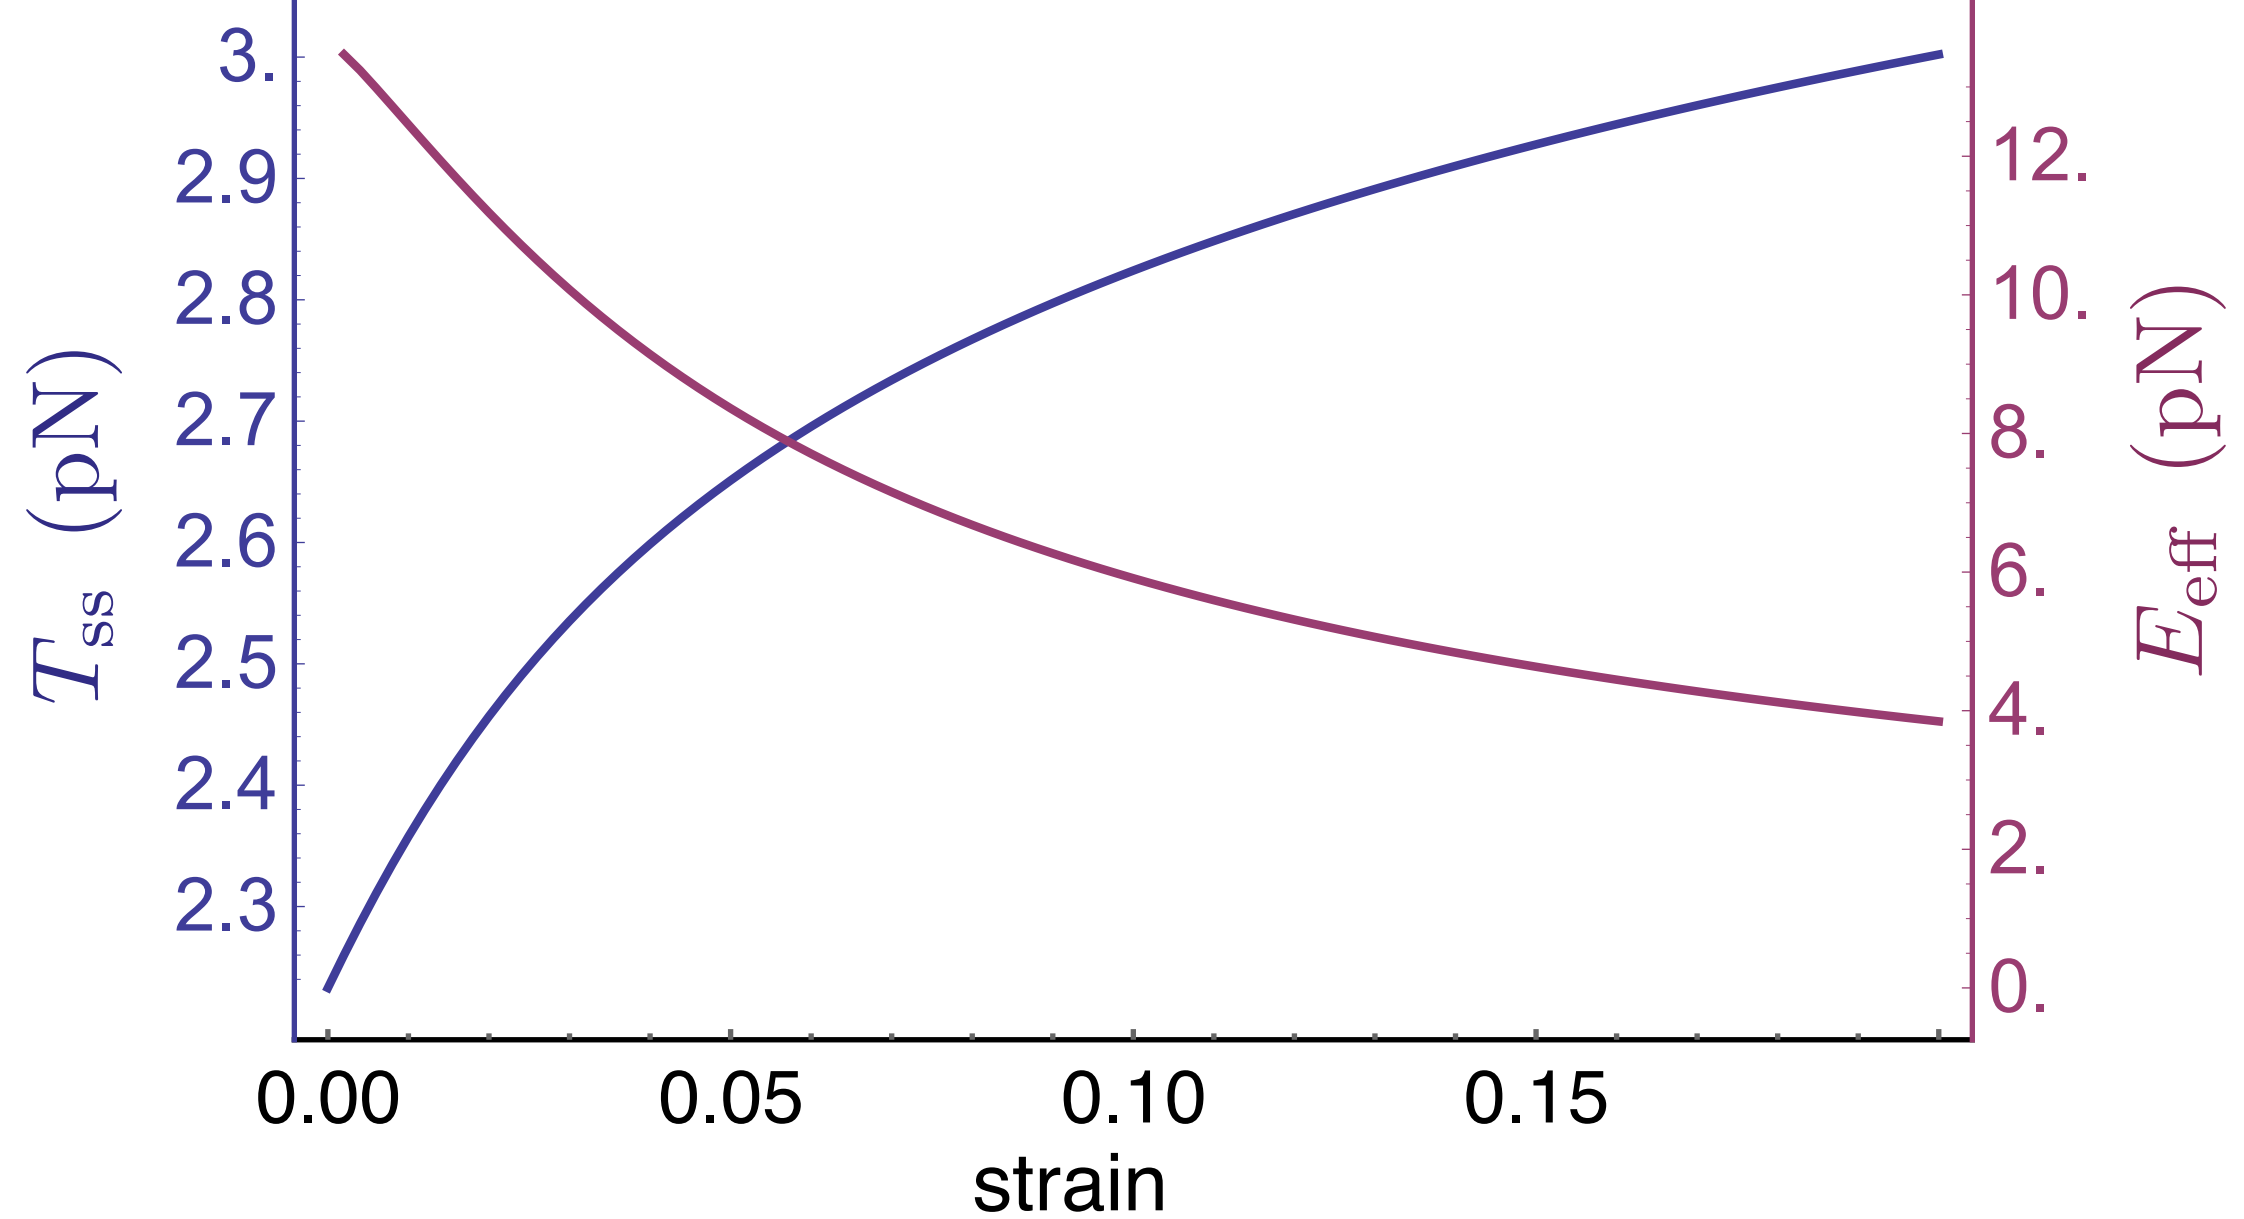

Supplement: supp [file elife-51772-supp-v1.zip]
